# Supplementary material for: Tunability of the Superconductivity of NbSe2 Films Grown by Two-Step Vapor Deposition
Source: MDPI journal article supplement (doi:10.3390/molecules28031059), 2023-01-20
Supplement: s1 [file s1]

Supplementary Materials for

## **“Tunability of the Superconductivity of NbSe<sub>2</sub> Films Grown by Two-Step Vapour Deposition”**

Huihui Lin<sup>1\*</sup>, Meijuan Chang<sup>1, 2</sup>, Xingjie Fu<sup>1</sup>, Pengfei Li<sup>1</sup>, Maoxin Chen<sup>1</sup>, Luyan Wu<sup>3</sup>, Fangqi Yang<sup>3\*</sup> and Quan Zhang<sup>4\*</sup>

<sup>1</sup> Department of Chemistry, National University of Singapore, Singapore 117549, Singapore

<sup>2</sup> Institute for Functional Intelligent Materials, Department of Materials Science and Engineering, National University of Singapore, Singapore 117575, Singapore

<sup>3</sup> Key Laboratory for Organic Electronics and Information Displays, Jiangsu Key Laboratory for Biosensors, Institute of Advanced Materials (IAM), Jiangsu National Synergetic Innovation Center for Advanced Materials (SICAM), Nanjing University of Posts and Telecommunications, Nanjing 210023, China

<sup>4</sup> College of Chemistry and Chemical Engineering, Hubei Normal University, Huangshi 435002, China

\* Correspondence: chmhuih@nus.edu.sg (H.L.); yangfq@email.ncu.edu.cn (F.Y.); zhangquan15@gmail.com (Q.Z.)

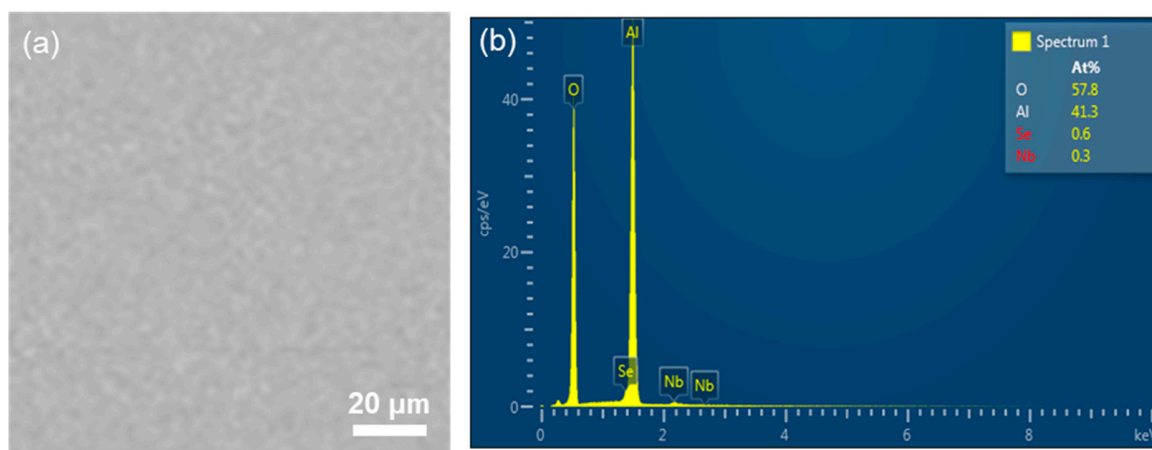

**Supplementary Figure S1 Elemental analysis of as-grown NbSe<sub>2</sub> film.** (a) SEM image and (b) EDS spectra of as-grown NbSe<sub>2</sub> film collected from a 100 μm × 100 μm region in Figure S1a.

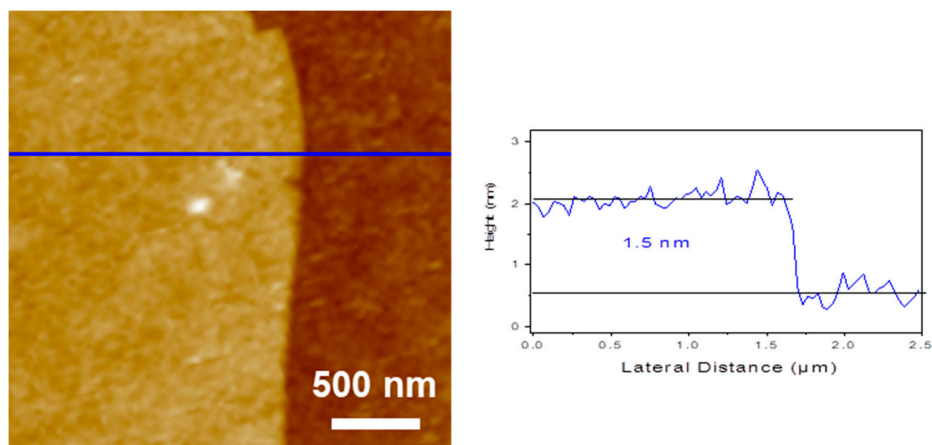

**Supplementary Figure S2 AFM characterization of as-sputtered Nb film.** AFM image and the corresponding height profile of a Nb film sputtered on sapphire.

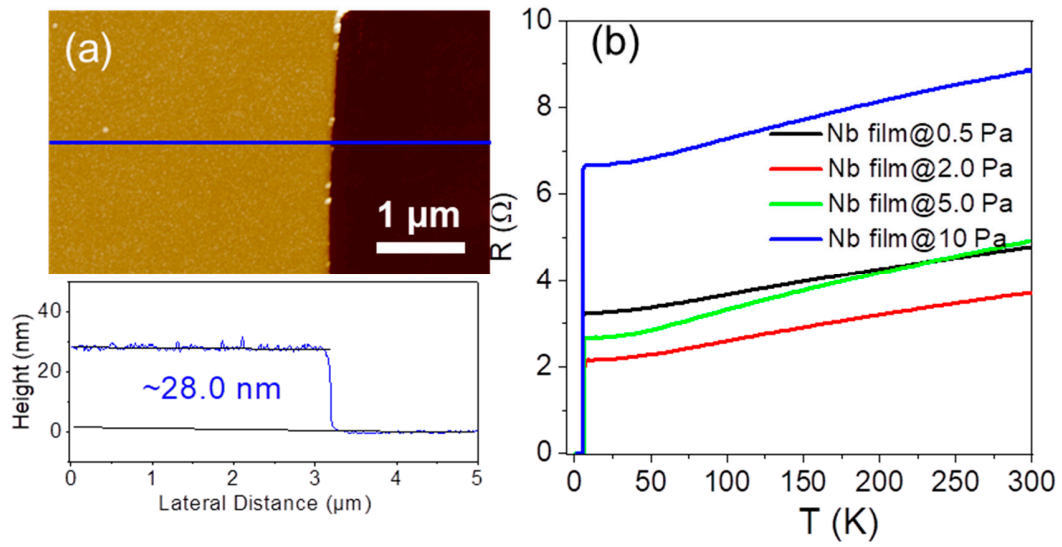

**Supplementary Figure S3 AFM characterization of a 28 nm Nb film and transport measurement of as-sputtered Nb films at the different sputtering pressure.** (a) AFM image and the corresponding height profile of an as-sputtered Nb film; (b) Superconductivity of as-sputtered Nb films at the different sputtering pressure. Note: The superconducting transition critical temperature ( $T_c$ ): is the temperature where the sheet resistance drops to 10% of its normal state.

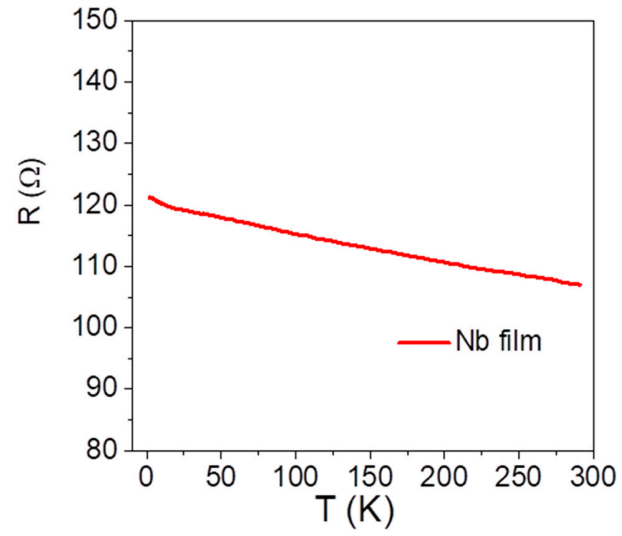

**Supplementary Figure S4 Transport property of a 5.5 nm Nb.** Temperature dependent resistance of a 5.5 nm Nb film, the film shows semimetal behavior ( $dR/dT < 0$ ) and without the appearance of superconductivity.

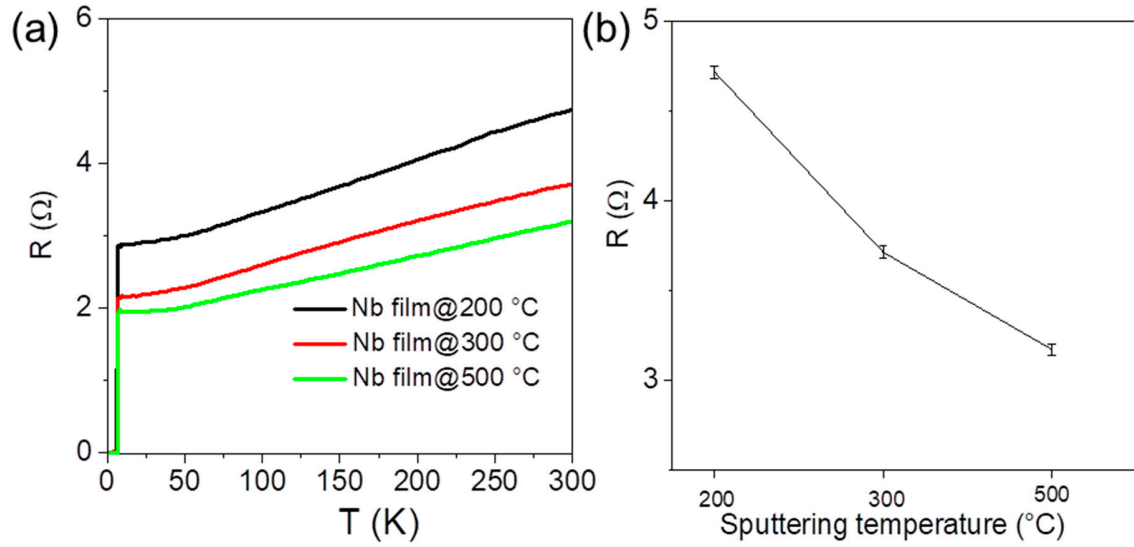

**Supplementary Figure S5 Transport measurement of as-sputtered Nb films at the different sputtering temperature.** (a) Superconductivity of as-sputtered Nb films at different sputtering temperature; (b) Resistance of as-sputtered Nb films at the different sputtering temperature (5 different sites are tested for every sample at room temperature).

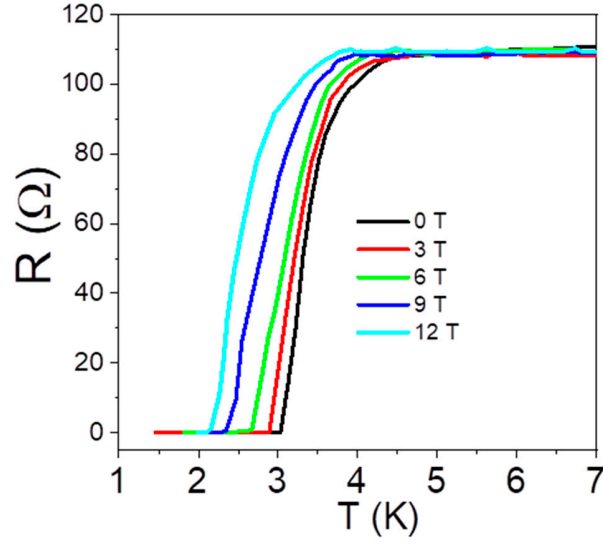

**Supplementary Figure S6 Superconducting resistivity transition of the NbSe<sub>2</sub> film under an in-plane magnetic field.**

As described by the Ginzburg-Landau (GL) theory of 2D superconductors, coherence length and effective thickness can be further derived from  $H_{c2\parallel}$  and  $H_{c2\perp}$  with the following relations:

$$H_{c2,\perp} = \frac{\Phi_0}{2\pi\xi_{GL}^2(0)} \left(1 - \frac{T}{T_c}\right), \quad H_{c2,\parallel} = \frac{\Phi_0\sqrt{12}}{2\pi\xi_{GL}^2(0)d_{SC}} \left(1 - \frac{T}{T_c}\right)^{\frac{1}{2}}$$

where  $\xi_{GL}(0)$  is the zero-temperature GL in-plane coherence length,  $\Phi_0$  is the magnetic flux quantum, and  $d_{SC}$  is the out-of-plane superconducting effective thickness. From the fitting, the coherent length is determined to be  $\sim 6.5$  nm. An effective thickness of  $\sim 3.2$  nm is obtained, which is smaller than  $\xi_{GL}(0)$  and revealed 2D behavior of the superconductivity in the as-grown NbSe<sub>2</sub> film.

**Supplementary Table S1 The  $T_c$  of monolayerNbSe<sub>2</sub> by different preparation methods.**

| Preparation method                | Layers/ L | Protective layer           | $T_c$ / K | Refs.                              |
|-----------------------------------|-----------|----------------------------|-----------|------------------------------------|
| Tape exfoliation                  | 1         | Thin h-BN layer            | ~ 2.9     | Nat. Phys. 2016, 12, 139. [14]     |
| MBE                               | 1         | ~ 10 nm amorphous Se layer | ~ 0.50    | Nat. Phys. 2016, 12, 92. [33]      |
| MBE                               | 1         | 20 nm amorphous Se layer   | ~ 0.65    | Nano lett. 2017, 17, 6802. [20]    |
| MBE                               | 1         | ~ 20 nm amorphous Se layer | ~ 1.0     | Nature Physics, 2019, 15, 904. [1] |
| Electrochemical exfoliation       | 1         | Thin h-BN layer            | ~3.2      | Nat. Mater. 2021, 20, 181 [27]     |
| Salt-assisted CVD                 | 1         | Graphene                   | ~ 1.0     | Nat. Commun. 2017, 8, 394 [22]     |
| Two-step vapour deposition method | 1         | None                       | ~ 2.0     | This work                          |



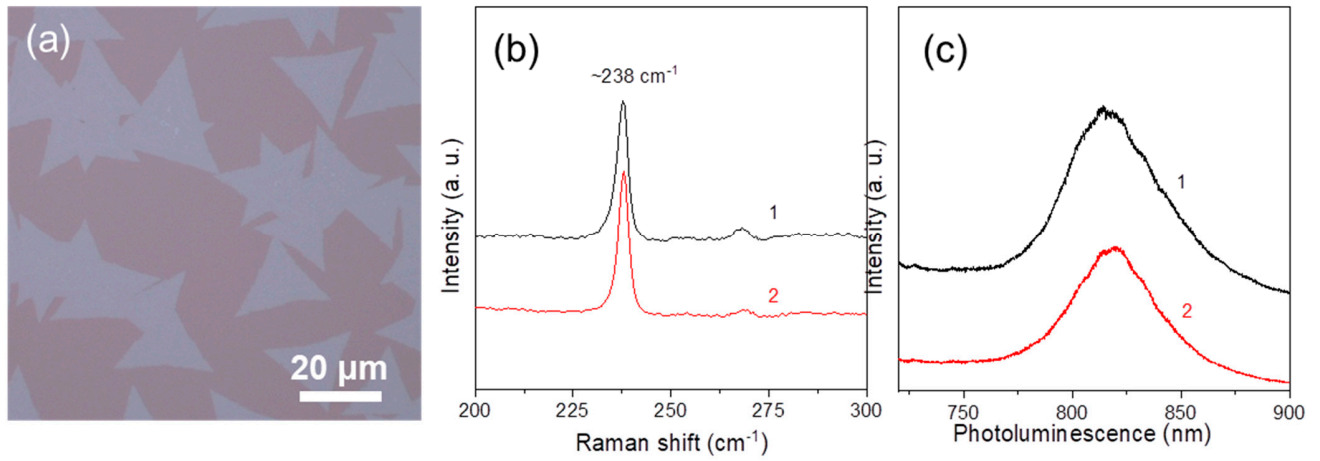

**Supplementary Figure S7 Monolayer MoSe<sub>2</sub> crystals grown by Two-Step Vapor Deposition.** (a) Optical microscopic image, (b) Raman spectra and (c) photoluminescence (PL) spectra of monolayer MoSe<sub>2</sub> crystals.

[1] Zhao, K. ; Lin, H. ; Xiao, X. ; Huang, W. ; Yao, W. and Yan, M. Disorder-induced multifractal superconductivity in monolayer niobium dichalcogenides. Nat. Phys. 2019,15, 904-910
